# Supplementary material
Source: ML conference proceedings conference paper supplement (https://proceedings.neurips.cc/paper_files/paper/2022/hash/32246544c237164c365c0527b677a79a-Abstract.html)
Supplement: Supplementary file 1 [file 32246544c237164c365c0527b677a79a-Supplemental-Conference.zip]

Archive with 3 entries (2 files):
- supplementary_material/
- supplementary_material/kernel_TD_released_code.zip
- supplementary_material/Full_Paper_with_Appendix.pdf
